# Supplementary material for: Analysis of the light intensity dependence of the growth of Synechocystis and of the light distribution in a photobioreactor energized by 635 nm light
Source: PeerJ. 2018 Jul 27;6:e5256. doi: 10.7717/peerj.5256 (PMC6065478; doi:10.7717/peerj.5256)
Supplement: Supplemental Information 1 — This file reports additional figures displaying slice trend of dispersed phase, photobioreactor characteristics, full set of equations employed in the modelling approach and additional physiological features for Synechocystis. [file peerj-06-5256-s001.docx]

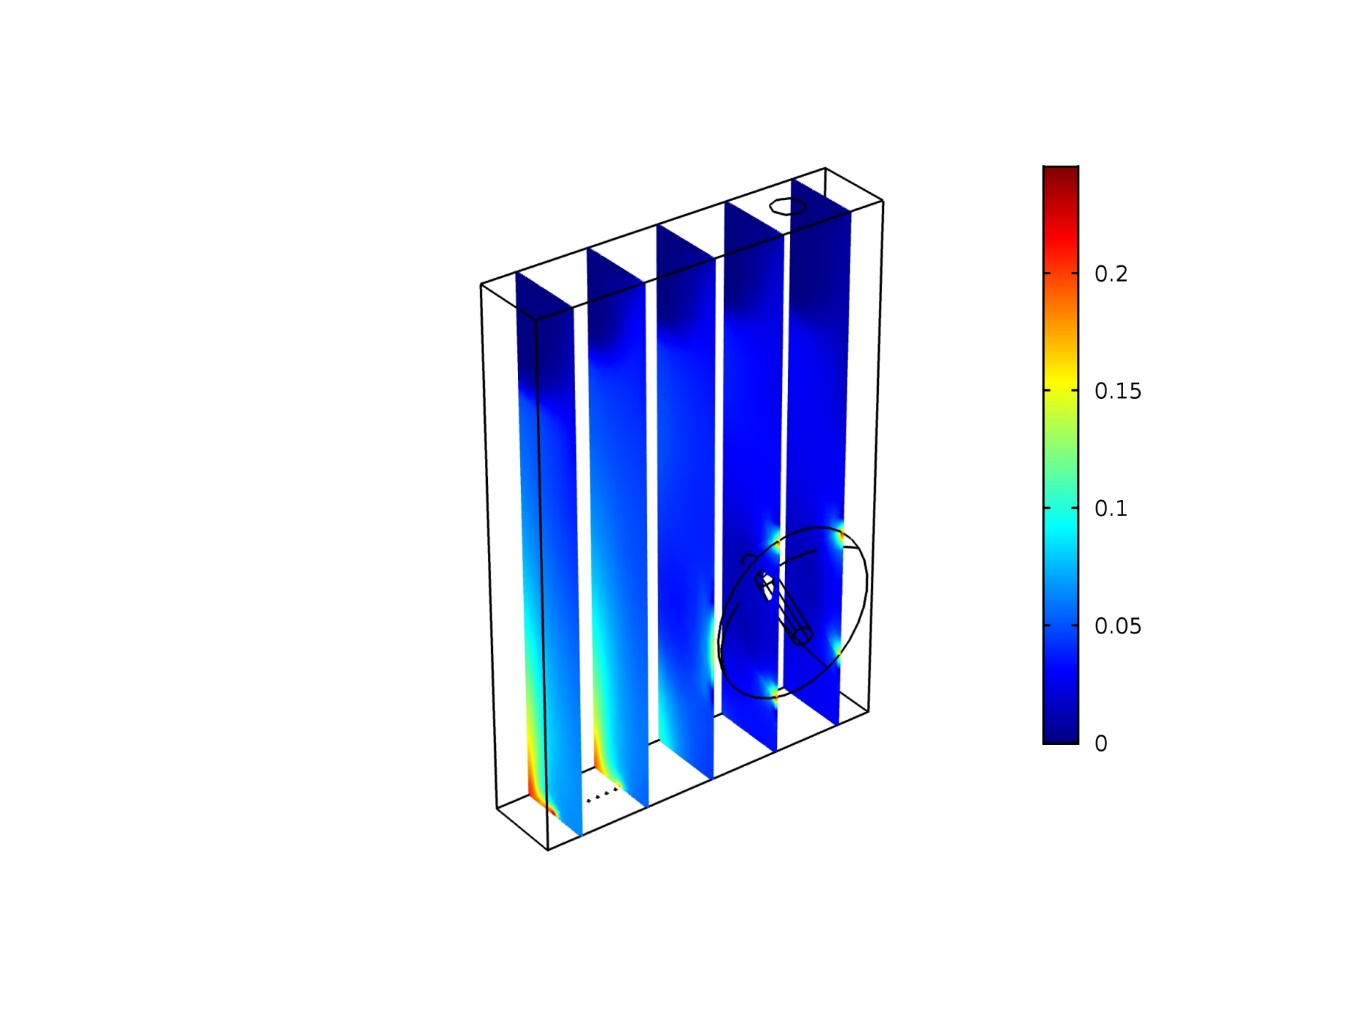


**Figure S13D slice trend of dispersed phase.**

The dispersed phase mixture of CO2 and N2 is plotted at 24 h and for incident light intensitiy, *Iinc*, equal to 300 µmol photons m-2 s-1


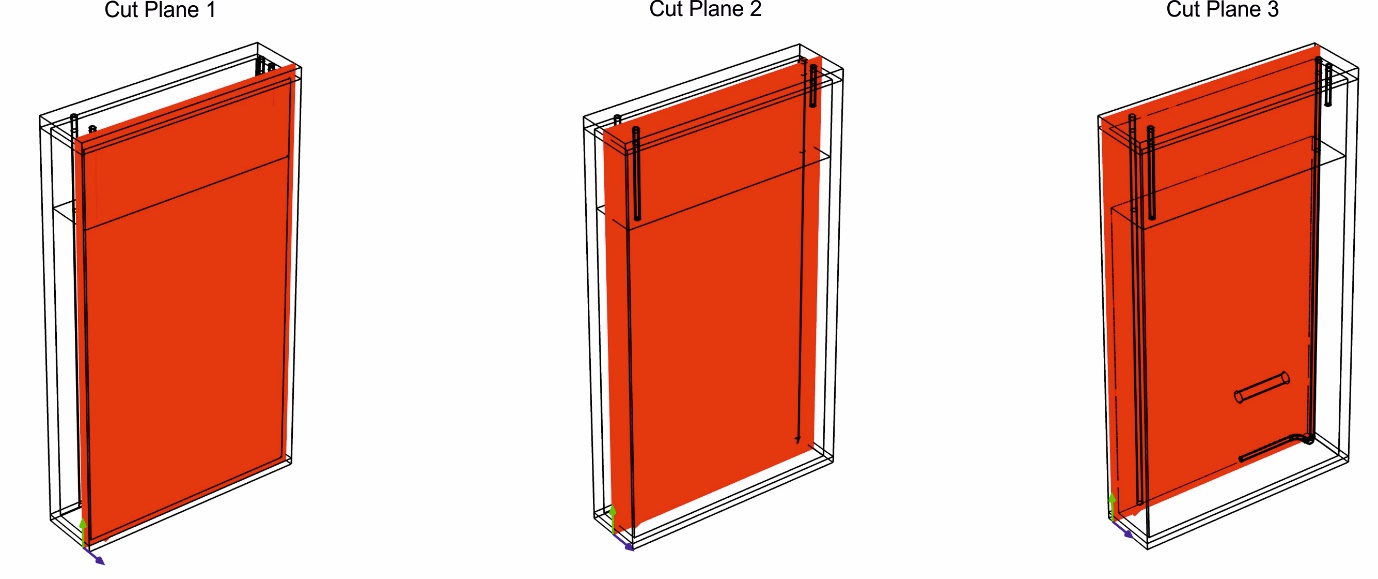


**Figure S2**

| **Equation** | **Domain** | **Mathematical model** |
| --- | --- | --- |
|  | 3-4-6-7 | MASS TRANSFER |
|  | 3-4-6-7 |
|  | 3-4-6-7 |
|  | 3-4-6-7 | FLUID-DYNAMICS |
|  | 3-4-6-7 |
|  | 4-6-7 |
|  | 4-6-7 |
|  | 4-6-7 |
|  | 4-6-7 |
|  | 4-6-7 |
|  | 4-6-7 |
|  | 3-4-6-7 |
|  | 3-4-6-7 |
|  | 3-4-6-7 |
|  | 3-4-6-7 |
|  | 3-4-6-7 |
|  | 3-4-6-7 |
|  | 3-4-6-7 |
|  | 3-4-6-7 |
|  | 3-4-6-7 |
|  | 3-4-6-7 |
|  | all | HEAT TRANSFER WITH RADIATION |
|  | all |
|  | 3-4-6-7-8 |
|  | 3-4-6-7-8 |
|  | 3-4-6-7-8 |
|  | 3-4-6-7-8 |
|  | 3-4-6-7-8 |
| + | 3-4-6-7-8 |
|  | 3-4-6-7-8 |
|  | 3-4-6-7-8 |
|  | 3-4-6-7-8 |
|  | 6-7 | GROWTH KINETICS |
|  | 6-7 |
|  |  |

**Table S1**

| **Light intensity**  **(µmol photons m-2 s-1)** | | **OD680/OD720** | |
| --- | --- | --- | --- |
|  |  | |  |
| 50 | 1.774 ± 0.002 | |  |
| 200 | 1.548 ± 0.042 | |  |
| 300 | 1.518 ± 0.009 | |  |
| 500 | 1.496 ± 0.022 | |  |
| 800 | 1.475 ± 0.010 | |  |
| 950 | 1.545 ± 0.035 | |  |
| 1460 | 1.597 ± 0.041 | |  |
| 200* | 1.557 ± 0.017 | |  |
|  |  | |  |
|  |  |  |  |

**Table S2**

| Domain | Element size | [m] |
| --- | --- | --- |
| Reator | Height | 0.1983 |
| Width | 0.11 |
| Thickness | 0.024 |
| Sparger | Diameter of inlet | 0.002 |
| Diameter of holes | 0.0004 |
| Number of holes | 7 |
| Lenght | 0.03 |
| Anchor | Diameter | 0.006 |
| Lenght | 0.035 |
| Vessel | Thickness | 0.0033 |

**Table S3**

|  | Gas phase | Liquid phase |
| --- | --- | --- |
| Inlet velocity | 150 ml/min | 0 |
| Outlet pressure | Gas outlet condition | Patm, no out |
| Gravity force | g=(9.81)ms-2 g=(9.81)ms-2 | |
| Wall conditions | No gas flux at the reactor boundary;  sparger non-slip model | Wall functions |
| Incident light intensity | 50/200/300/500/800/950/1460 µmol photons m-2s-1 | |

**Table S4**

| Iin | Iout | Iads | Iads | Vol | mu |  |  | efficiency |
| --- | --- | --- | --- | --- | --- | --- | --- | --- |
| mmol photons m-2s-1 | mmol photons m-2s-1 | mmol photons m-2s-1 | mol m-3h-1 | L | h-1 | gDW L-1 | mol photons g DW-1 | gDW mol photons-1 |
| 50 | 31.75 | 18.25 | 2.74 | 0.38 | 0.05 | 0.15 | 0.37 | 2.70 |
| 200 | 140.20 | 59.80 | 8.97 | 0.38 | 0.11 | 0.14 | 0.61 | 1.64 |
| 300 | 219.00 | 81.00 | 12.15 | 0.38 | 0.12 | 0.15 | 0.75 | 1.33 |
| 500 | 386.40 | 113.60 | 17.04 | 0.38 | 0.11 | 0.15 | 1.11 | 0.90 |
| 800 | 631.55 | 168.45 | 25.27 | 0.38 | 0.10 | 0.15 | 1.68 | 0.60 |
| 950 | 770.45 | 179.55 | 26.94 | 0.38 | 0.09 | 0.15 | 2.11 | 0.48 |

**Table S5**
